# Supplementary material for: Omicron BA.1 and BA.2 neutralizing activity elicited by a comprehensive panel of human vaccines
Source: PubMed Central journal article supplement — bioRxiv. 2022 Mar 16:2022.03.15.484542. Preprint. [Version 1] doi: 10.1101/2022.03.15.484542 (PMC8936098; doi:10.1101/2022.03.15.484542), 2022-03-16
Supplement: NIHPP2022.03.15.484542V1-supplement-1.pdf [file NIHPP2022.03.15.484542V1-supplement-1.pdf]

## Supplementary Material

**Table S1.** SARS-CoV-2 BA.1 and BA.2 spike mutations as compared to Wuhan-Hu-1.

| BA.1                                                                                                      | Both                                                                                                                                                  | BA.2                                                                        |
|-----------------------------------------------------------------------------------------------------------|-------------------------------------------------------------------------------------------------------------------------------------------------------|-----------------------------------------------------------------------------|
| A67V, del69/70, T95I,<br>del143/145, N211I,<br>del212/212, S371L, G496S,<br>Q498R, T547K, N856K,<br>L981F | G142D, G339D, S373P,<br>S375F, S477N, T478K,<br>E484A, Q493R, Q498R,<br>N501Y, Y505H, D614G,<br>H655Y, N679K, P681H,<br>N764K, D796Y, Q954H,<br>N969K | T19I, L24S, del25/27, V213G,<br>S371F, T376A, D405N,<br>R408S, K417N, N440K |

**Table S2.** Demographics data of enrolled plasma donors.

| Vaccine                            | Sample | Sex | Age | Days Since Last Dose | Vaccine           | Sample | Sex | Age | Days Since Last Dose | Vaccine                    | Sample | Sex        | Age | Days Since Last Dose |
|------------------------------------|--------|-----|-----|----------------------|-------------------|--------|-----|-----|----------------------|----------------------------|--------|------------|-----|----------------------|
| 1x Ad26.COV2.S                     | 46H    | M   | 60  | 15                   | 2x AstraZeneca    | 38     | F   | 29  | 47                   | 3x mRNA-1273 & 3x BNT162b2 | 8H     | M          | 79  | 78                   |
|                                    | 82H    | M   | 28  | 57                   |                   | 40     | F   | 51  | 47                   |                            | 12H    | F          | 42  | 18                   |
|                                    | 85H    | M   | 29  | 102                  |                   | 41     | F   | 39  | 46                   |                            | 15H    | M          | 52  | 13                   |
|                                    | 86H    | F   | 26  | 90                   |                   | 43     | M   | 47  | 47                   |                            | 29H    | M          | 64  | 13                   |
|                                    | 87H    | F   | 28  | 100                  |                   | 45     | F   | 48  | 43                   |                            | 35H    | M          | 60  | 47                   |
|                                    | 88H    | F   | 30  | 100                  |                   | 47     | F   | 31  | 40                   |                            | 51H    | F          | 50  | 25                   |
|                                    | 89H    | M   | 31  | 102                  |                   | 48     | F   | 37  | 47                   |                            | 53H    | F          | 38  | 14                   |
|                                    | 90H    | M   | 38  | 142                  |                   | 49     | F   | 36  | 46                   |                            | 54H    | F          | 34  | 15                   |
|                                    | 91H    | F   | 26  | 105                  |                   | 51     | F   | 29  | 47                   |                            | 55H    | F          | 52  | 18                   |
|                                    | 92H    | F   | 33  | 102                  |                   | 52     | M   | 46  | 47                   |                            | 56H    | M          | 46  | 97                   |
| 1x Washington-1 Infected           | 9C     | F   | 41  | 41                   | 53                | F      | 37  | 46  | 72H                  | F                          | 35     | 15         |     |                      |
|                                    | 10C    | F   | 31  | 31                   | 54                | F      | 29  | 46  | 76H                  | F                          | 38     | 14         |     |                      |
|                                    | 26C    | F   | 28  | 28                   | 0884-000341D0-001 | F      | 72  | 14  | 80H                  | F                          | 35     | 25         |     |                      |
|                                    | 30C    | F   | 35  | 42                   | 0884-00033A00-001 | M      | 38  | 14  | 8H                   | M                          | 79     | 11         |     |                      |
|                                    | 47C    | F   | 41  | 35                   | 0884-00036K00-001 | F      | 43  | 12  | 9H                   | F                          | 75     | 7          |     |                      |
|                                    | 54C    | M   | 36  | 41                   | 0933-0004FG00-001 | M      | 51  | 14  | 12H                  | F                          | 42     | 10         |     |                      |
|                                    | 65C    | M   | 42  | 36                   | 0933-0004KC00-001 | F      | 26  | 14  | 20H                  | F                          | 33     | 6          |     |                      |
|                                    | 73C    | M   | 49  | 42                   | 0932-00064B00-001 | F      | 60  | 13  | 27H                  | M                          | 59     | 11         |     |                      |
|                                    | 114C   | F   | 41  | 49                   | 0884-0003WD00-001 | M      | 54  | 13  | 37H                  | F                          | 57     | 7          |     |                      |
|                                    | 144C   | M   | 48  | 41                   | 0897-0001SB00-001 | F      | 41  | 15  | 38H                  | F                          | 26     | 10         |     |                      |
| 2x BBIBP-CorV                      | 151C   | F   | 41  | 48                   | 0889-0004WJ00-001 | F      | 48  | 14  | 56H                  | M                          | 46     | 15         |     |                      |
|                                    | 182C   | M   | 78  | 78                   | 0889-0004FG00-001 | F      | 28  | 16  | 58H                  | F                          | 50     | 15         |     |                      |
|                                    | 2      | M   | 36  | 78                   | 0889-0004KC00-001 | F      | 36  | 13  | 60H                  | F                          | 42     | 8          |     |                      |
|                                    | 3      | F   | 41  | 9                    | 0889-0002SD00-001 | M      | 43  | 14  | 69H                  | F                          | 68     | 13         |     |                      |
|                                    | 4      | F   | 25  | 74                   | 31H               | F      | 49  | 13  | 10H                  | M                          | 33     | 14         |     |                      |
|                                    | 5      | F   | 26  | 71                   | 46H               | M      | 60  | 16  | 14H                  | F                          | 67     | 9          |     |                      |
|                                    | 6      | F   | 34  | 82                   | P142              |        |     |     | 15H                  | M                          | 52     | 9          |     |                      |
|                                    | 7      | M   | 29  | 76                   | P297              |        |     |     | 16H                  | F                          | 46     | 6          |     |                      |
|                                    | 8      | F   | 34  | 15                   | P284              |        |     |     | 17H                  | M                          | 76     | 17         |     |                      |
|                                    | 9      | F   | 33  | 15                   | P643              |        |     |     | 23H                  | F                          | 34     | 15         |     |                      |
| 2x Sputnik V                       | 10     | M   | 27  | 84                   | P354              |        |     |     | 26H                  | F                          | 41     | 11         |     |                      |
|                                    | 11     | F   | 28  | 102                  | P116              |        |     |     | 77H                  | F                          | 28     | 14         |     |                      |
|                                    | 12     | M   | 36  | 22                   | P948              |        |     |     | 78H                  | M                          | 22     | 15         |     |                      |
|                                    | 13     | F   | 26  | 102                  | P033              |        |     |     | 79H                  | F                          | 27     | 20         |     |                      |
|                                    | 1      |     |     |                      | P622              |        |     |     | 5840                 | F                          | 73     | 165        |     |                      |
|                                    | 2      |     |     |                      | P399              |        |     |     | 6082                 | M                          | 21     | 103 or 160 |     |                      |
|                                    | 3      |     |     |                      | P4042             |        |     |     | 6090                 | F                          | 36     | 90 or 165  |     |                      |
|                                    | 4      |     |     |                      | P232              |        |     |     | 6096                 | M                          | 18     | 55 or 160  |     |                      |
|                                    | 5      |     |     |                      | P4608             |        |     |     | 6097                 | M                          | 18     | 68 or 173  |     |                      |
|                                    | 6      |     |     |                      | P6049             |        |     |     | 6099                 | M                          | 20     | 78 or 159  |     |                      |
| 2x AZD1222 1x BNT162b2 / mRNA-1273 | 7      |     |     |                      | 38                | F      | 30  | 87  | 6259                 | F                          | 42     | 78 or 155  |     |                      |
|                                    | 8      |     |     |                      | 40                | F      | 52  | 114 | 6261                 | M                          | 60     | 77 or 191  |     |                      |
|                                    | 9      |     |     |                      | 41                | F      | 40  | 88  | 6322                 | F                          | 41     | 168        |     |                      |
|                                    | 10     |     |     |                      | 43                | M      | 48  | 92  |                      |                            |        |            |     |                      |
|                                    | 11     |     |     |                      | 45                | F      | 49  | 83  |                      |                            |        |            |     |                      |
|                                    | 12     |     |     |                      | 47                | F      | 32  | 81  |                      |                            |        |            |     |                      |
|                                    |        |     |     |                      | 48                | F      | 38  | 81  |                      |                            |        |            |     |                      |
|                                    |        |     |     |                      | 51                | F      | 30  | 88  |                      |                            |        |            |     |                      |
|                                    |        |     |     |                      | 52                | M      | 47  | 87  |                      |                            |        |            |     |                      |
|                                    |        |     |     |                      | 53                | F      | 38  | 88  |                      |                            |        |            |     |                      |
|                                    |        |     |     |                      | 54                | F      | 30  | 88  |                      |                            |        |            |     |                      |
|                                    |        |     |     |                      | 57                | F      | 46  | 94  |                      |                            |        |            |     |                      |
|                                    |        |     |     | 58                   | F                 | 29     | 90  |     |                      |                            |        |            |     |                      |
|                                    |        |     |     | 59                   | M                 | 48     | 84  |     |                      |                            |        |            |     |                      |
|                                    |        |     |     | 62                   | F                 | 41     | 79  |     |                      |                            |        |            |     |                      |
|                                    |        |     |     | 67                   | F                 | 42     | 90  |     |                      |                            |        |            |     |                      |
|                                    |        |     |     | 68                   | M                 | 26     | 123 |     |                      |                            |        |            |     |                      |
|                                    |        |     |     | 71                   | F                 | 27     | 89  |     |                      |                            |        |            |     |                      |

### A 1x WA-1 Infected

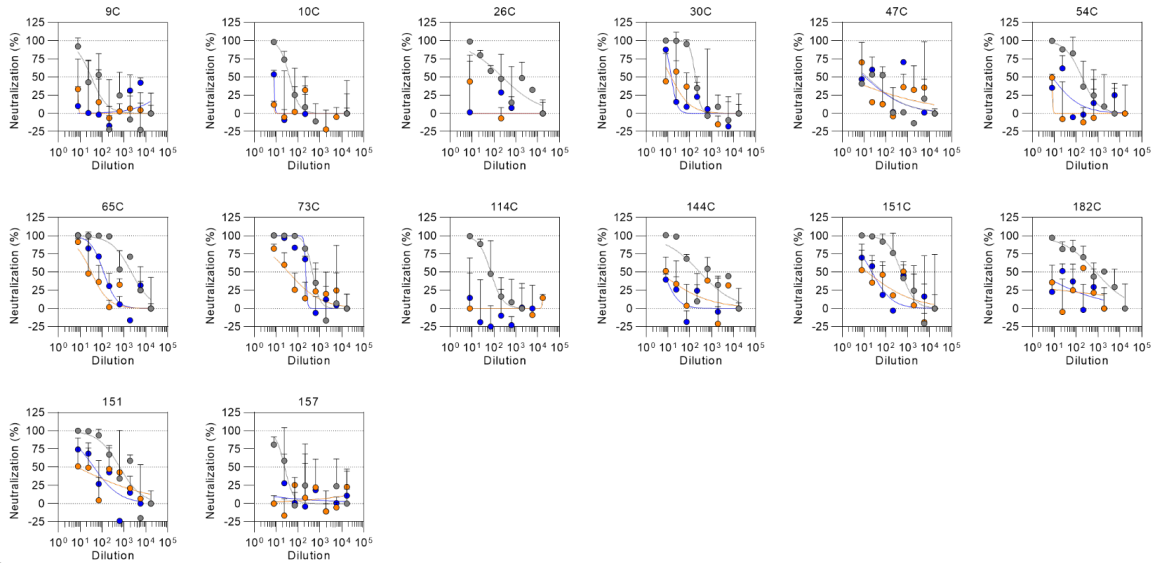

### B 2x mRNA-1273

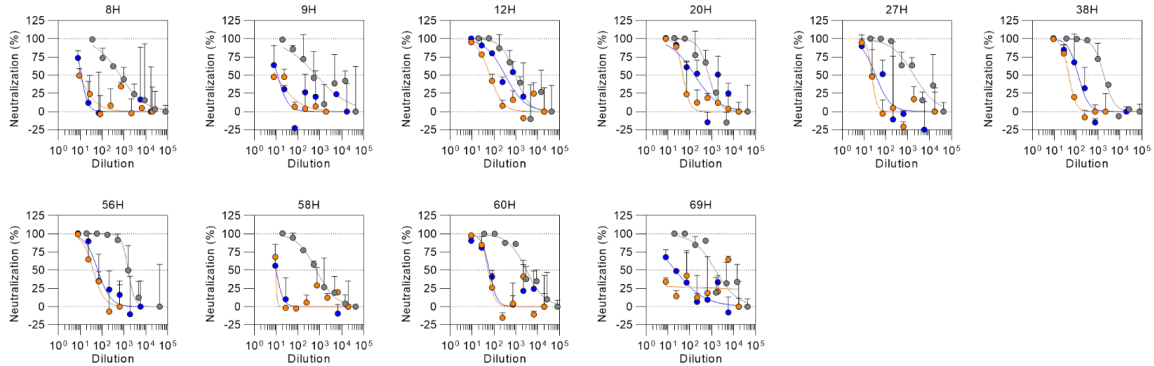

### C 2x BNT162b2

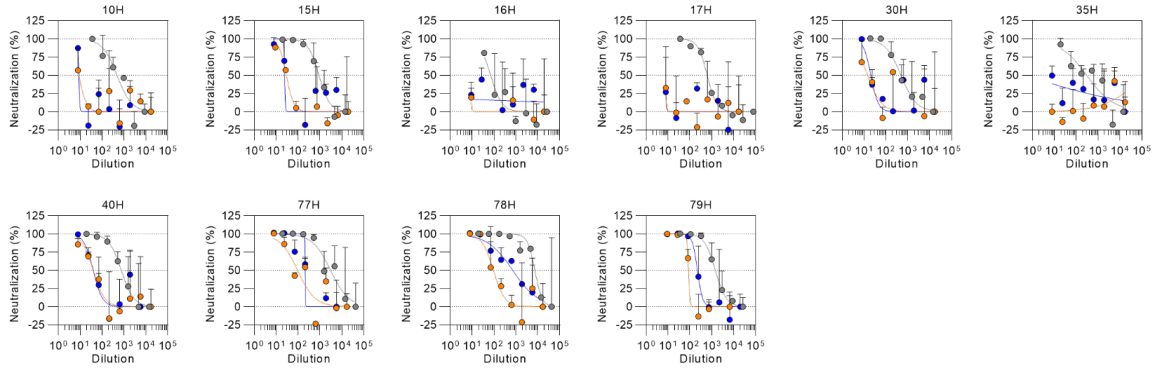

**D** 2x NVX-CoV2373

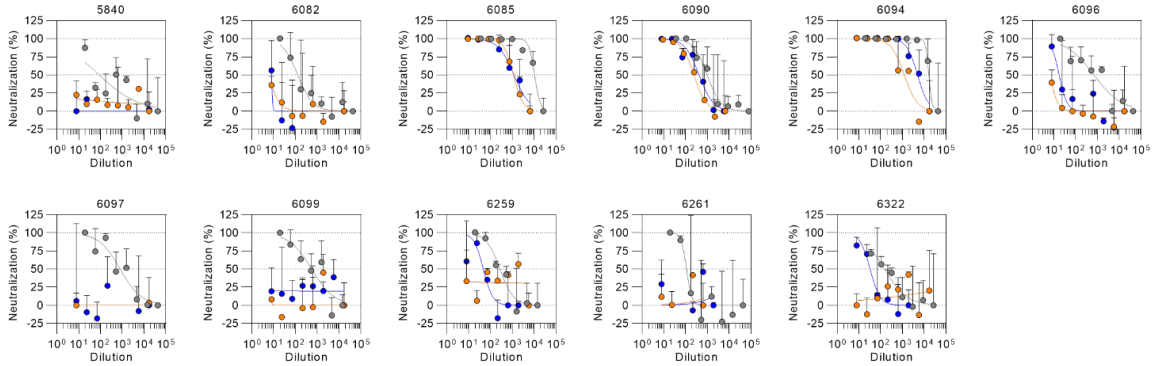

**E** 1x Ad26.COV2.S

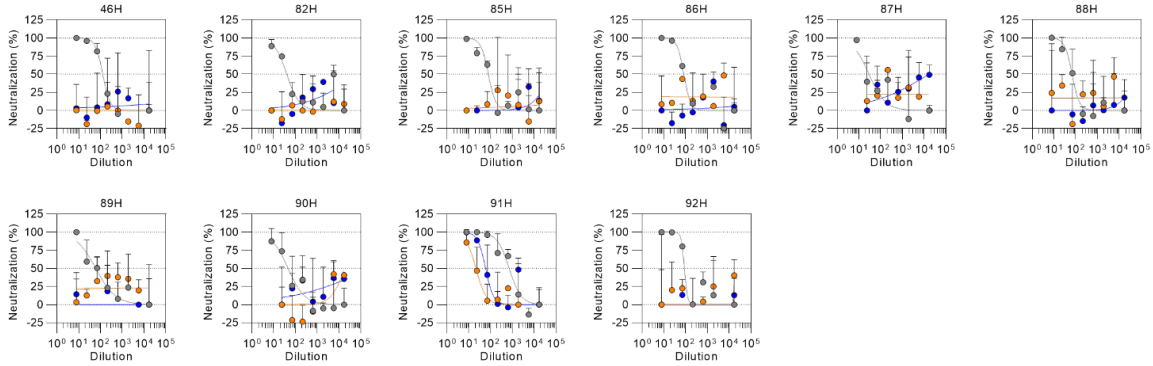

**F** 2x AZD1222

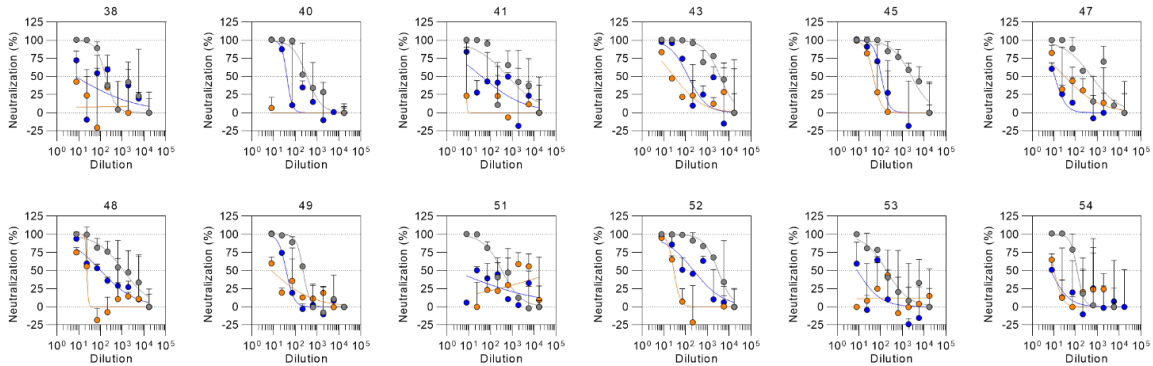

**G** 2x Sputnik V

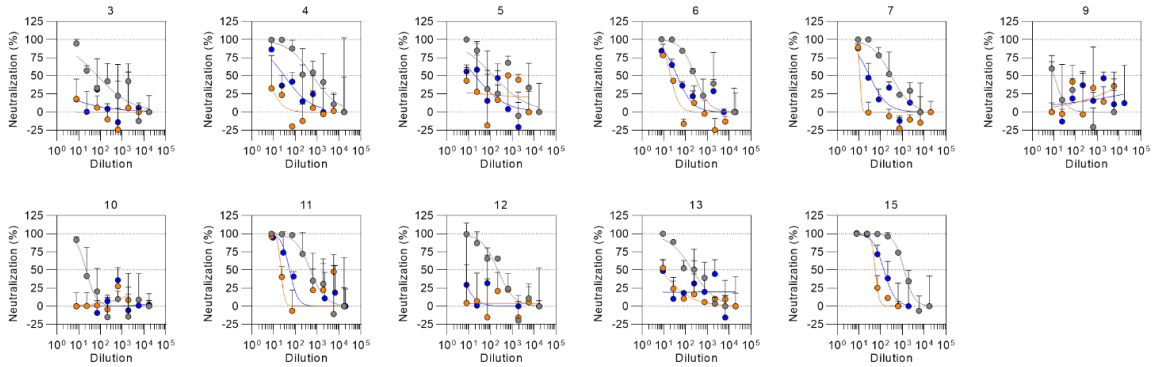

## H 2x BBIBP-CorV

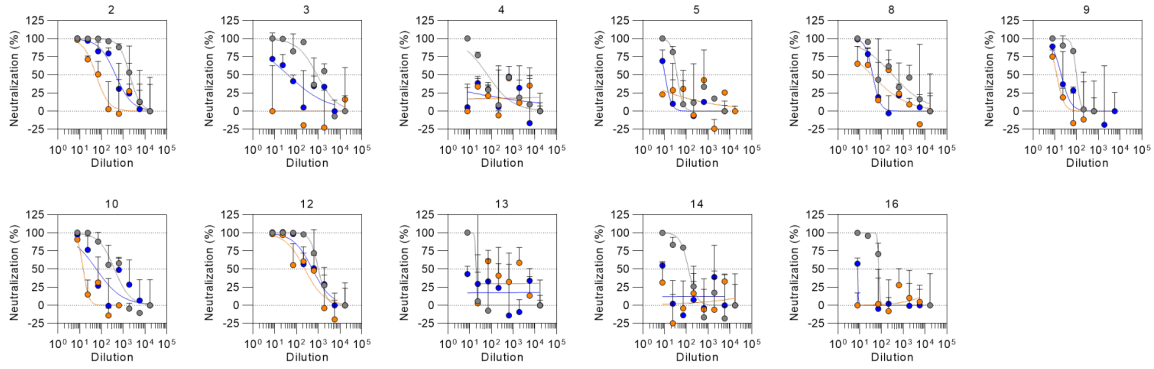

**Fig. S1.** Normalized neutralization curves using VSV pseudovirus containing the SARS-CoV-2 G614 spike (gray), BA.1 spike (orange), or BA.2 spike (blue) on VeroE6-TMPRSS2 cells using plasma from subjects after their primary vaccine series.

**A** 3x mRNA-1273 & 3x BNT162b2

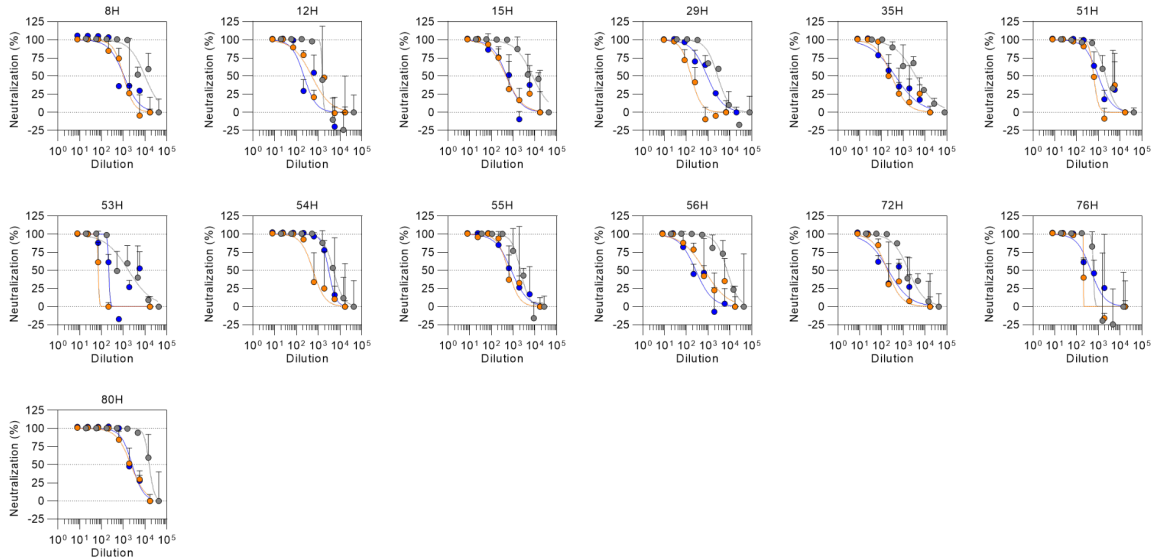

**B** 2x Ad26.COVS.S & 1x Ad26.COVS.S 1x BNT162b2

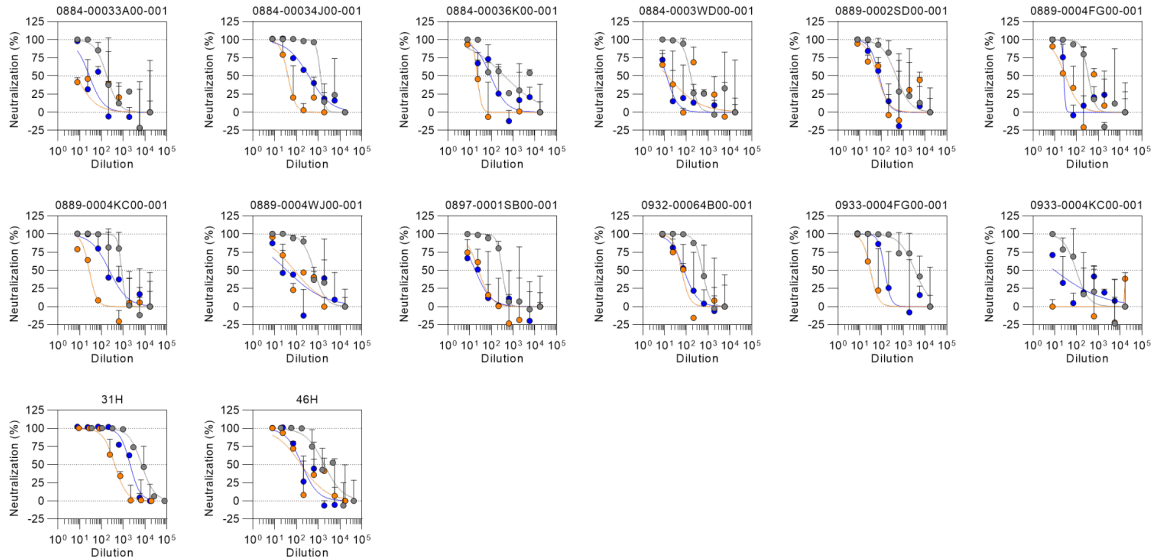

**C** 2x AZD1222 1x BNT162b2 & 2x AZD1222 1x mRNA-1273

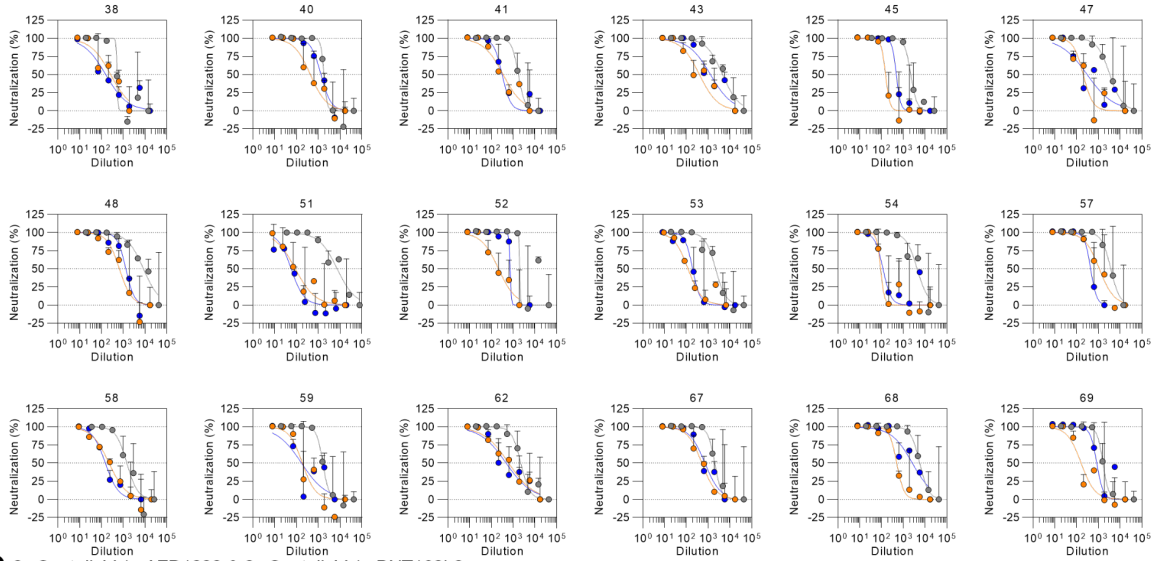

**D** 2x Sputnik V 1x AZD1222 & 2x Sputnik V 1x BNT162b2

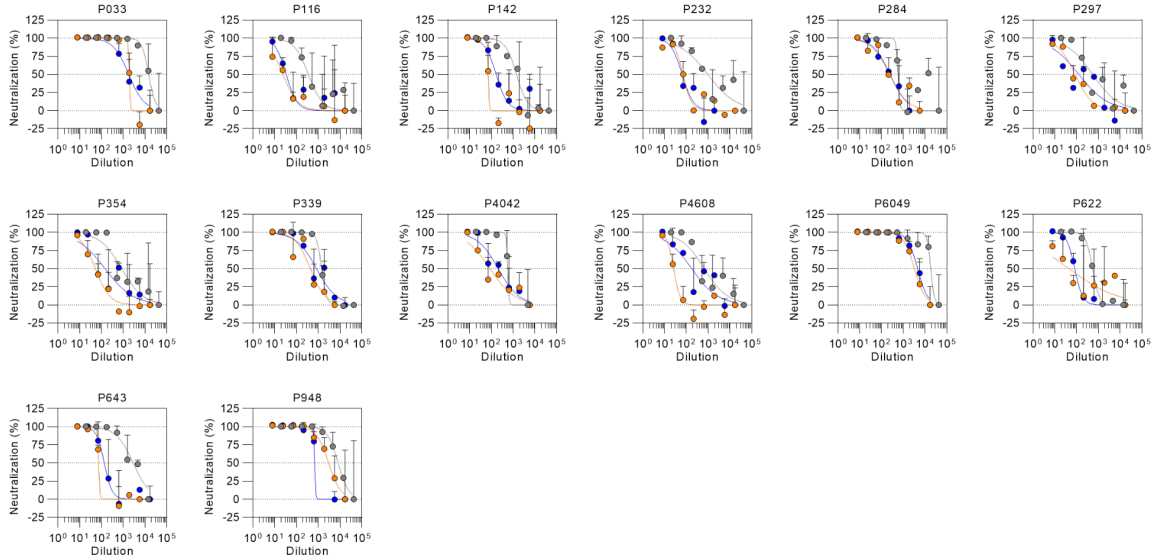

**Fig. S2.** Normalized neutralization curves using VSV pseudovirus containing the SARS-CoV-2 G614G (gray), BA.1 spike (orange), or BA.2 spike (blue) on VeroE6-TMPRSS2 cells using plasma from subjects after receiving a booster dose.
